# Supplementary material
Source: PubMed Central journal article supplement (PMC4354157)
Supplement: ncomms6921-s1.pdf [file ncomms6921-s1.pdf]

## Supplementary Information

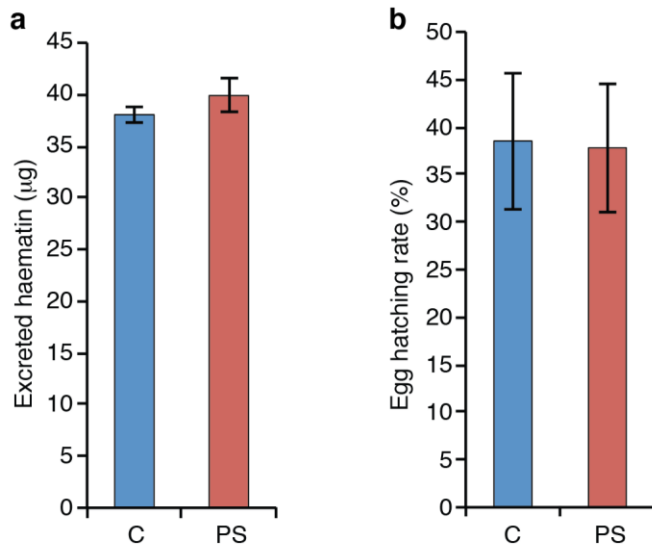

**Supplementary Fig. 1. Bloodmeal antibiotics do not affect the bloodmeal size and egg hatching rate.**

The bloodmeal size (**a**) and egg hatching rate (**b**) were quantified in mosquitoes fed on blood supplemented with PS or water (control, 'C'). In **a**, the bloodmeal size was quantified by haematin excretion revealed by colorimetric reaction with  $\text{LiCO}_3$ . Results are shown as averages of 2 (**a**) and 3 (**b**) independent experiments and error bars show data range (**a**) and standard errors (**b**). n=8-12 (**a**) and 50-80 (**b**) mosquitoes per sample

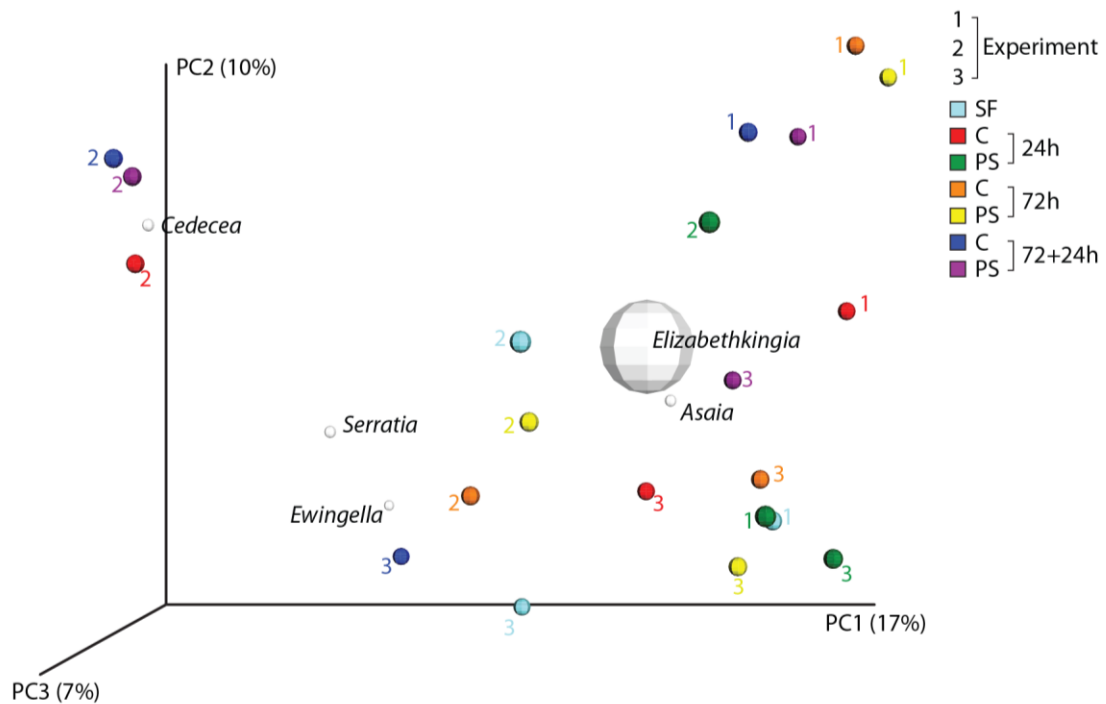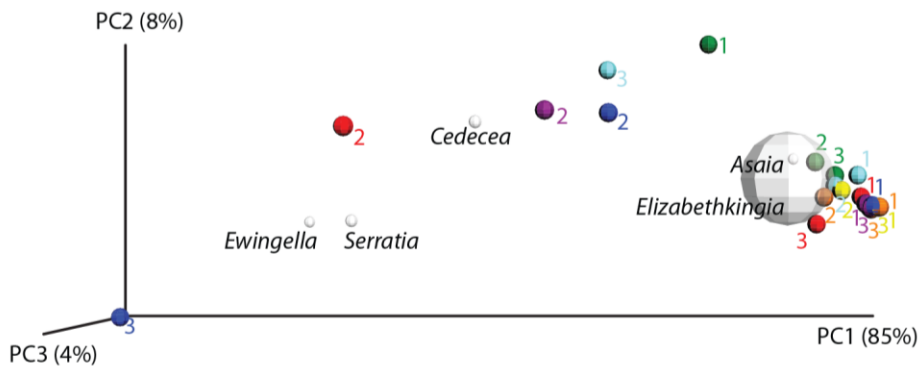

**Supplementary Fig. 2. Principal Coordinates Analysis of the microbiota composition.** The PcoA is based on unweighted (top) and weighted (bottom) UniFrac distances between the samples included in the pyrosequencing analysis (**Fig. 1b**). Each coloured sphere represents one sample, its colour and number reflecting its feeding condition and replicate, respectively. Grey spheres are localised where the five main bacterial genera are more prevalent and their size reflects their contribution to the microbiota composition. n=15-25 mosquitoes per sample

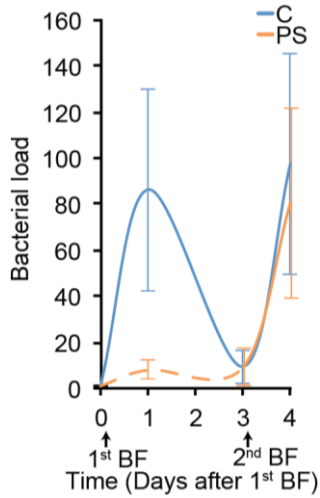

**Supplementary Fig. 3. qPCR analysis of the samples included in the pyrosequencing experiment.** qPCR quantification of midgut bacterial 16S rDNA in sugar-fed mosquitoes, 24h and 72 h after blood-feed supplemented with PS or water and 24h after a second non-treated blood-feed. Data show the average [ $\pm$  SEM] of three independent experiments included in the pyrosequencing analysis shown **Fig. 1b**. n=15-25 mosquitoes per sample.

**Supplementary Table 1. Alpha diversity observed by 454-pyrosequencing**

|                  | 24h   |      |         | 72h   |      |         | 72h+24h |       |         |
|------------------|-------|------|---------|-------|------|---------|---------|-------|---------|
|                  | C     | PS   | p-value | C     | PS   | p-value | C       | PS    | p-value |
| Chao1            | 178.5 | 92.6 | 0.00030 | 118.2 | 96.9 | 0.041   | 191.4   | 161.0 | 0.10    |
| Shannon          | 1.27  | 0.84 | 0.022   | 0.28  | 0.25 | 0.0015  | 1.96    | 1.01  | 0.00039 |
| Observed Species | 90.2  | 33.4 | 2.9E-6  | 32.3  | 28.8 | 0.0013  | 104.5   | 71.9  | 0.0017  |
| PD whole tree    | 8.76  | 4.20 | 2.3E-6  | 4.30  | 4.05 | 0.053   | 9.67    | 6.91  | 0.00093 |

C - Control; PS - PS-treated; PD: phylogenetic diversity. Statistical tests: ANOVA/lmer.

**Supplementary Table 2. Detailed results of infections with naturally *P. falciparum*-infected blood**

|                                      | Experiment 1 |      | Experiment 2 |      | Experiment 3 |      | Experiment 4 |      |
|--------------------------------------|--------------|------|--------------|------|--------------|------|--------------|------|
|                                      | C            | PS   | C            | PS   | C            | PS   | C            | PS   |
| <b>Gametocytemia</b>                 | 16           | 16   | 20           | 20   | 208          | 208  | 160          | 160  |
| <b>Number of mosquitoes</b>          | 36           | 40   | 18           | 31   | 81           | 100  | 54           | 48   |
| <b>Prevalence</b>                    | 63.9         | 77.5 | 77.8         | 90.3 | 86.4         | 90.5 | 70.4         | 58.3 |
| <b>Median (oocysts)</b>              | 1.0          | 3.0  | 2.5          | 8.0  | 20.0         | 32.0 | 4.0          | 2.0  |
| <b>Average (oocysts)</b>             | 3.1          | 4.5  | 3.5          | 7.8  | 29.3         | 39.2 | 6.3          | 5.2  |
| <b>Average excluding 0 (oocysts)</b> | 4.9          | 5.8  | 4.5          | 8.6  | 33.9         | 43.3 | 8.9          | 8.9  |

Gametocytemia shows the number of gametocytes per 1000 leucocytes.

**Supplementary Table 3. Primer sequences used for qPCR analysis**

| <b>Target</b>                  | <b>Forward primer</b>             | <b>Reverse primer</b>              |
|--------------------------------|-----------------------------------|------------------------------------|
| <i>Eubacteria</i> <sup>1</sup> | TCCTACGGGAGGCAGC<br>AGT           | GGACTACCAGGGTATCTA<br>ATCCTGTT     |
| <i>Flavobacteriaceae</i>       | TAAGGTTGAAGTGGCT<br>GGAATAA       | GTCCATCAGCGTCAGTTA<br>AGACT        |
| <i>Enterobacteriaceae</i>      | CGTGCTACAATGGCAT<br>ATACAAAGAGAAG | AGCATTCTGATCTACGAT<br>TACTAGCGATTC |
| <i>Acetobacteraceae</i>        | GTGCCGATCTCTAAAA<br>GCCGTCTCA     | TTCGCTCACCGGCTTCGG<br>GT           |
| <i>A. gambiae</i> S7           | GTGCGCGAGTTGGAGA<br>AGA           | ATCGGTTTGGGCAGAATG<br>C            |

**Supplementary Table 4. 454-pyrosequencing multiplex identifiers (MID) and number of sequences obtained for each sample**

| Experiment | Treatment        | MID Number | Barcode Sequence | All sequences | Non-chimeric sequences |
|------------|------------------|------------|------------------|---------------|------------------------|
| 1          | SF               | 6          | ATATCGCGAG       | 10739         | 10369                  |
| 1          | BF C 24h         | 8          | CTCGCGTGTC       | 9231          | 9229                   |
| 1          | BF PS 24h        | 9          | TAGTATCAGC       | 7744          | 7486                   |
| 1          | BF C 72h         | 12         | TACTGAGCTA       | 10798         | 10787                  |
| 1          | BF PS 72h        | 13         | CATAGTAGTG       | 13816         | 13815                  |
| 1          | BF C 72+24h      | 17         | CGTCTAGTAC       | 14195         | 14185                  |
| 1          | BF PS 72+24h     | 18         | TCTACGTAGC       | 8723          | 8683                   |
| 1          | negative control | 21         | CGTAGACTAG       | 3476          | 3222                   |
| 2          | SF               | 22         | TACGAGTATG       | 6549          | 6389                   |
| 2          | BF C 24h         | 24         | TAGAGACGAG       | 8138          | 8136                   |
| 2          | BF PS 24h        | 25         | TCGTCGCTCG       | 4559          | 4358                   |
| 2          | BF C 72h         | 28         | ACTACTATGT       | 2773          | 2757                   |
| 2          | BF PS 72h        | 29         | ACTGTACAGT       | 6757          | 6723                   |
| 2          | BF C 72+24h      | 33         | ATAGAGTACT       | 4873          | 4873                   |
| 2          | BF PS 72+24h     | 34         | CACGCTACGT       | 8960          | 8956                   |
| 2          | negative control | 37         | TACACACACT       | 14            | 14                     |
| 3          | SF               | 38         | TACACGTGAT       | 8240          | 8213                   |
| 3          | BF C 24h         | 40         | TACGCTGTCT       | 10354         | 10282                  |
| 3          | BF PS 24h        | 41         | TAGTGTAGAT       | 9361          | 9355                   |
| 3          | BF C 72h         | 44         | TCTAGCGACT       | 8060          | 8060                   |
| 3          | BF PS 72h        | 45         | TCTATACTAT       | 9411          | 9411                   |
| 3          | BF C 72+24h      | 49         | ACGCGATCGA       | 3731          | 3704                   |
| 3          | BF PS 72+24h     | 50         | ACTAGCAGTA       | 4866          | 4863                   |
| 3          | negative control | 53         | AGTCGAGAGA       | 1919          | 1757                   |

### Supplementary reference

- 1 Nadkarni, M. A., Martin, F. E., Jacques, N. A. & Hunter, N. Determination of bacterial load by real-time PCR using a broad-range (universal) probe and primers set. *Microbiology* **148**, 257-266 (2002).
